# Supplementary material for: Recombination resistance identification through current–voltage curve reconstruction in perovskite solar cells
Source: Royal Society of Chemistry journal article supplement (doi:10.1039/d4cp04143g), 2024-01-01
Supplement: d4cp04143g1.pdf [file d4cp04143g1.pdf]

## Supporting Information

### Recombination Resistance Identification through Current-Voltage Curve Reconstruction in Perovskite Solar Cells

Pablo F. Betancur<sup>1</sup>, Omar E. Solis<sup>1</sup>, Rafael Abargues<sup>1</sup>, Teresa S. Ripolles<sup>1</sup>, and Pablo P. Boix<sup>2\*</sup>

<sup>1</sup> Instituto de Ciencia de los Materiales de la Universidad de Valencia (ICMUV), 46980, Paterna, València, Spain.

<sup>2</sup> Instituto de Tecnología Química, Universitat Politècnica València-Consejo Superior de Investigaciones Científicas, Av. dels Tarongers, 46022, València, Spain.

\*Corresponding author

**Table S1.** Parameters used for the  $j$ - $V$  curve reconstruction under different light intensities.  $\beta$  parameter was calculated either the slope of  $R_{rec+tr}$  vs  $V_{app}$  (Figure S4a) or from the correlation between  $j_{sc}$  with  $R_{rec}$  at open circuit conditions (equation 2 main manuscript).

| Device                    | Ligth intensity (mWcm <sup>-2</sup> ) | $\beta$ from $R_{rec}$ | $\beta$ from Eq2 | $m$ from $R_{rec}$ | $m$ from Eq2 |
|---------------------------|---------------------------------------|------------------------|------------------|--------------------|--------------|
| PEDOT:PSS/C <sub>60</sub> | 10                                    | 0.86                   | 0.96             | 2.08               | 2.43         |
| PEDOT:PSS/C <sub>60</sub> | 50                                    | 0.81                   | 0.81             | 2.70               | 2.5          |
| PEDOT:PSS/C <sub>60</sub> | 100                                   | 0.71                   | 0.79             | 3.12               | 3.12         |
| MeO-2PACz/C <sub>60</sub> | 10                                    | 0.48                   | 0.41             | 1.16               | 1.04         |
| MeO-2PACz/C <sub>60</sub> | 50                                    | 0.37                   | 0.40             | 1.23               | 1.23         |
| MeO-2PACz/C <sub>60</sub> | 100                                   | 0.32                   | 0.32             | 1.41               | 1.26         |

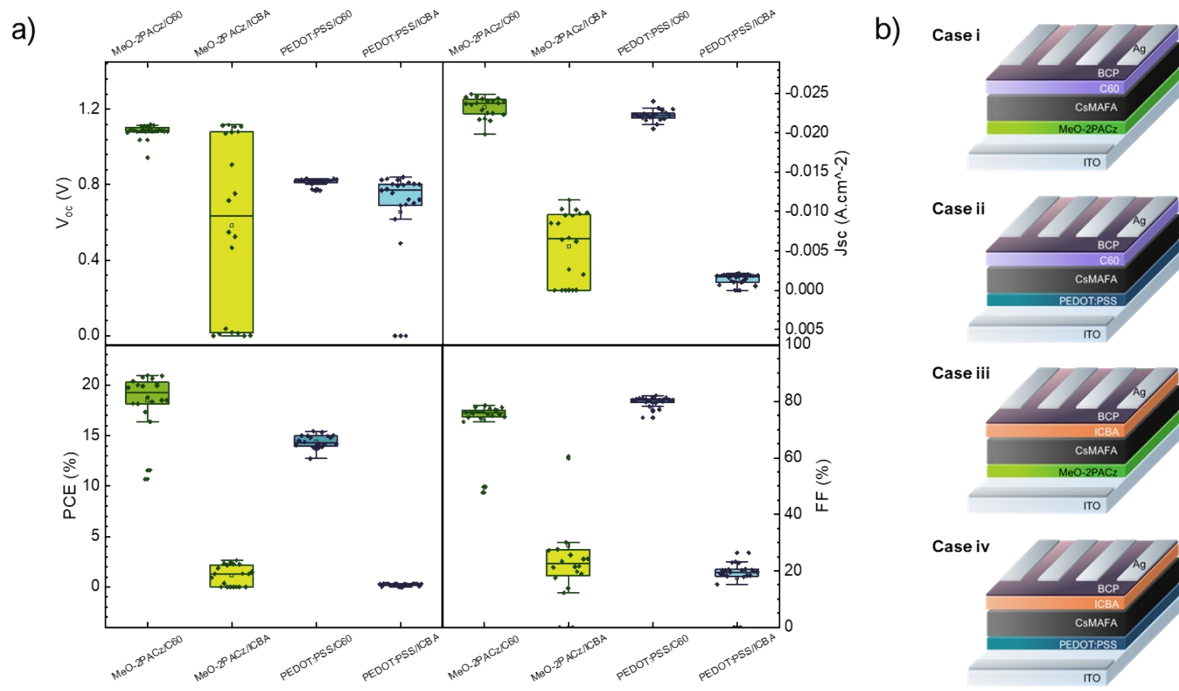

**Figure S1.** a) Statistics of the devices under study with different selective contacts (HTM/ETM) at 1 sun illumination. b) Schematic of the devices.

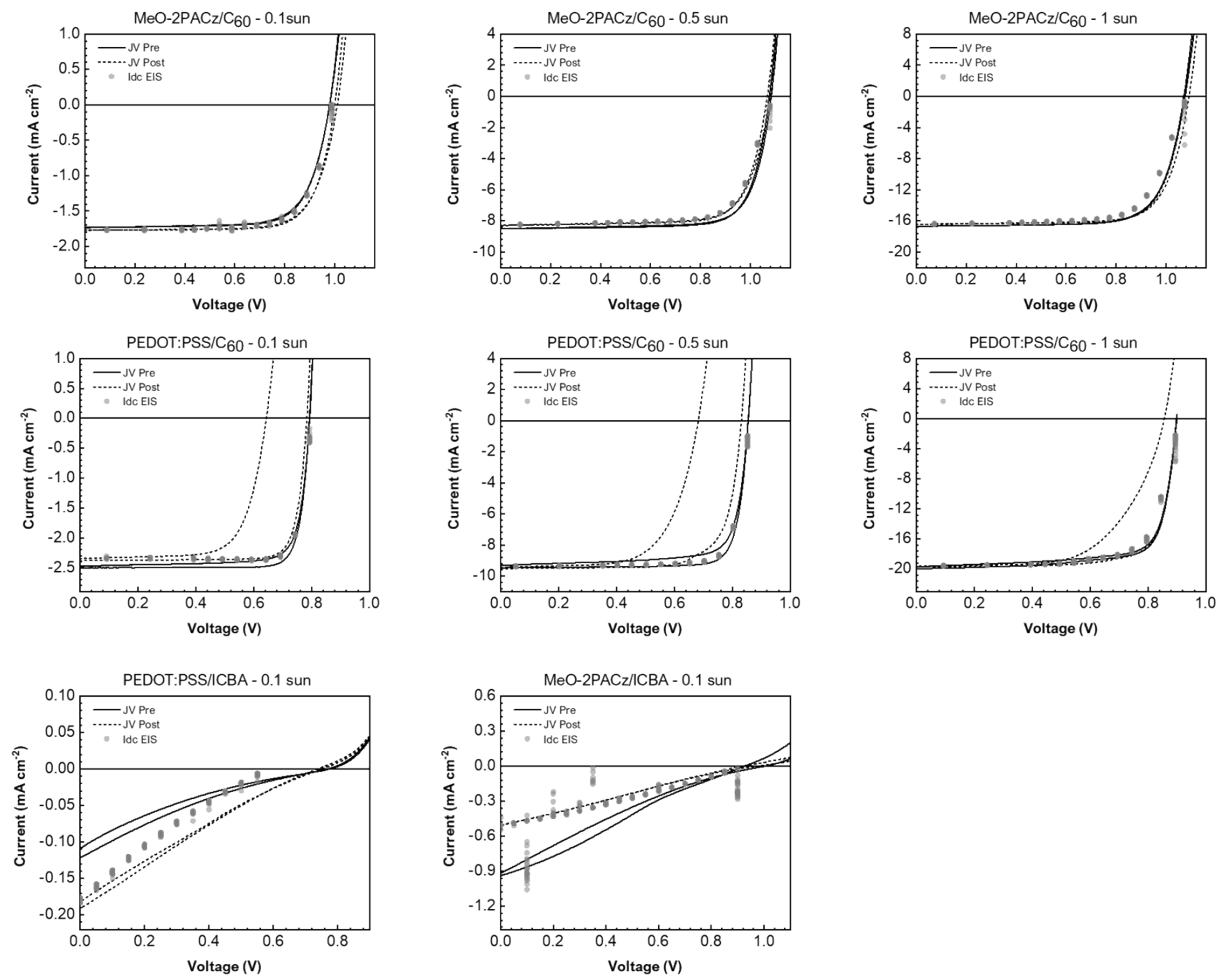

**Figure S2.** Device stability during IS measurements. Solid line represents *J-V* pre-IS, segmented line *J-V* pos-IS, and dots the DC current values measured during the IS at each specific voltage bias.

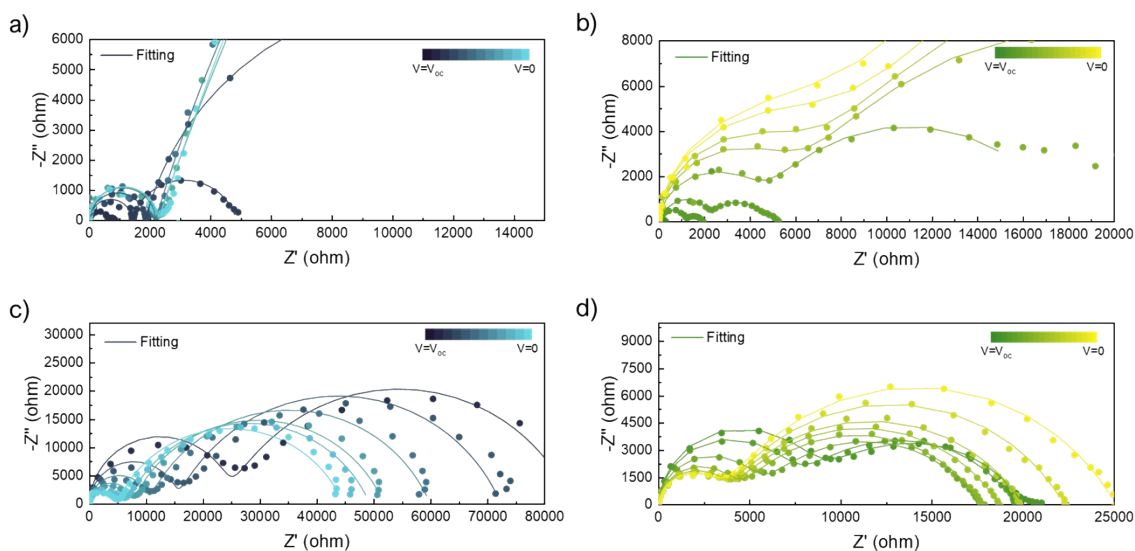

**Figure S3.** Nyquist plots of the devices with different selective contacts: PEDOT:PSS (a, c) and MeO-2PACz (b, d) were used as HTMs, and  $C_{60}$  (a, b) and ICBA (c, d) were used as ETMs. The measurements were performed at different bias from  $V_{app}=V_{oc}$  to  $V_{app}=0$  V.

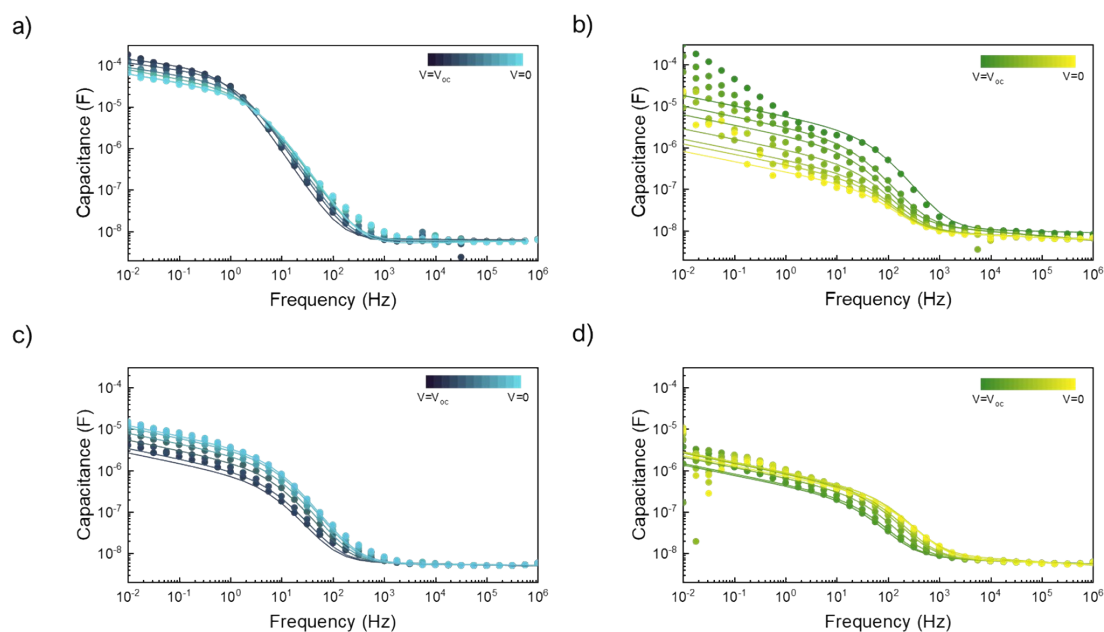

**Figure S43.** Bode plots of the devices with different selective contacts: PEDOT:PSS (a, c) and MeO-2PACz (b, d) were used as HTMs, and  $C_{60}$  (a, b) and ICBA (c, d) were used as ETMs. The measurements were performed at different bias from  $V_{app}=V_{oc}$  to  $V_{app}=0$  V.

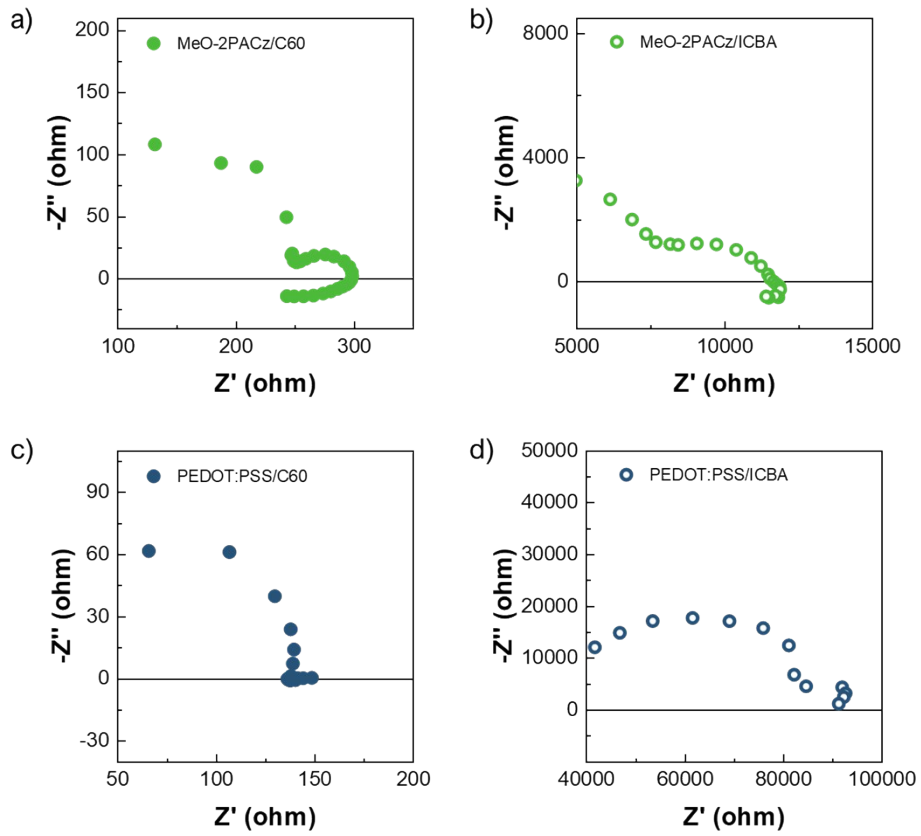

**Figure S5.** Nyquist plots at low frequency regime for the devices under open-circuit conditions.

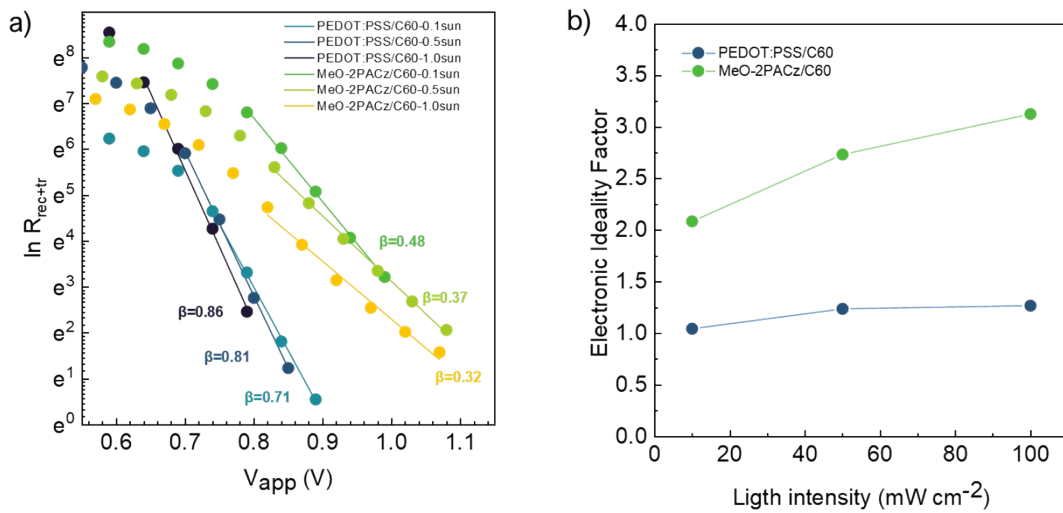

**Figure S6.** (a)  $\beta$  parameter calculated from the slope of  $R_{rec+tr}$  vs  $V_{app}$  for devices with  $C_{60}$  as ETM under different illumination intensities. (b) Light intensity dependence of the electronic ideality factor ( $m=1/\beta$ ).

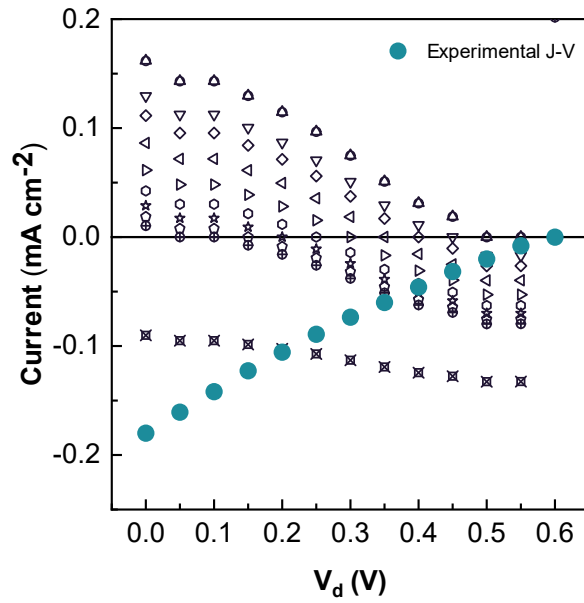

**Figure S7.** Comparison between experimental  $j$ - $V$  curves at  $10 \text{ mW/cm}^2$  (dots) and its reconstruction using equation 4 (main manuscript, empty shapes). The reconstruction was carry calculating the  $m$  value associate to each  $V_{\text{app}}$  (equation 2, with  $R_{\text{rec}}(V_F)$ ).

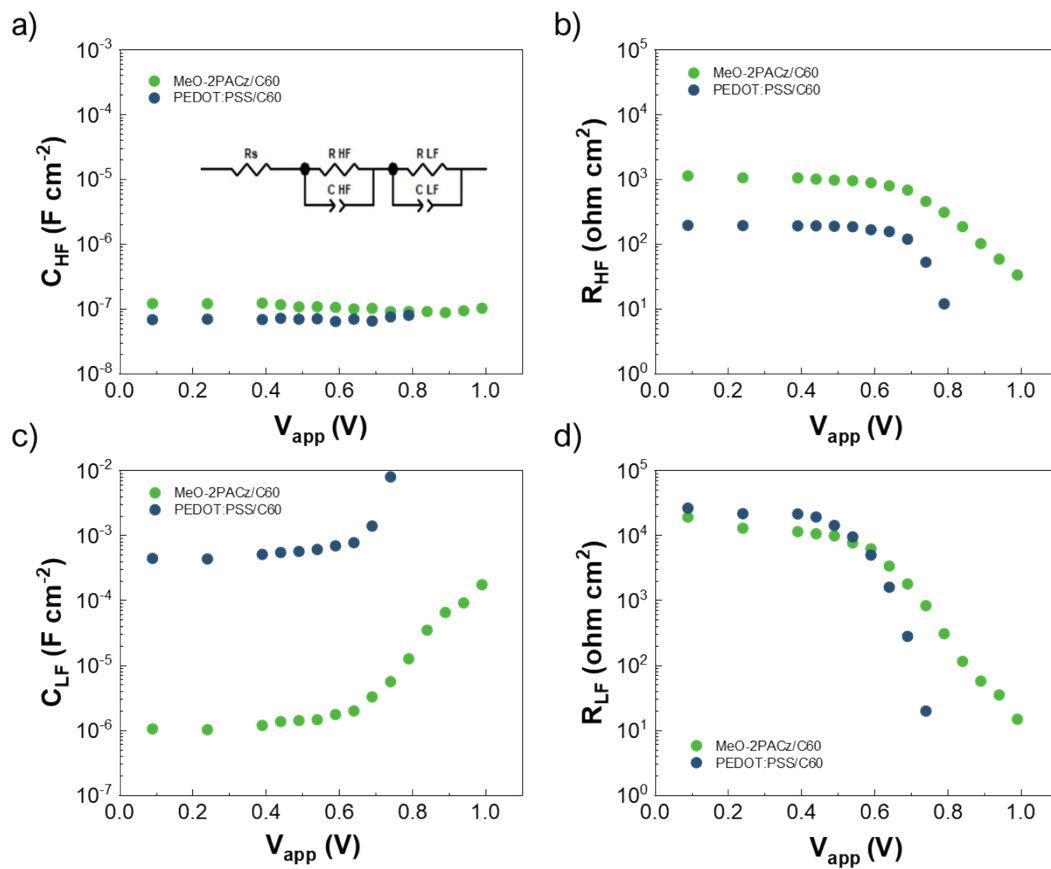

**Figure S8.** (a, c) Capacitive and (b, d) resistive elements as extracted from the fittings of the impedance spectra under  $0.1 \text{ sun}$ . The inset in (a) shows the ECM implemented.

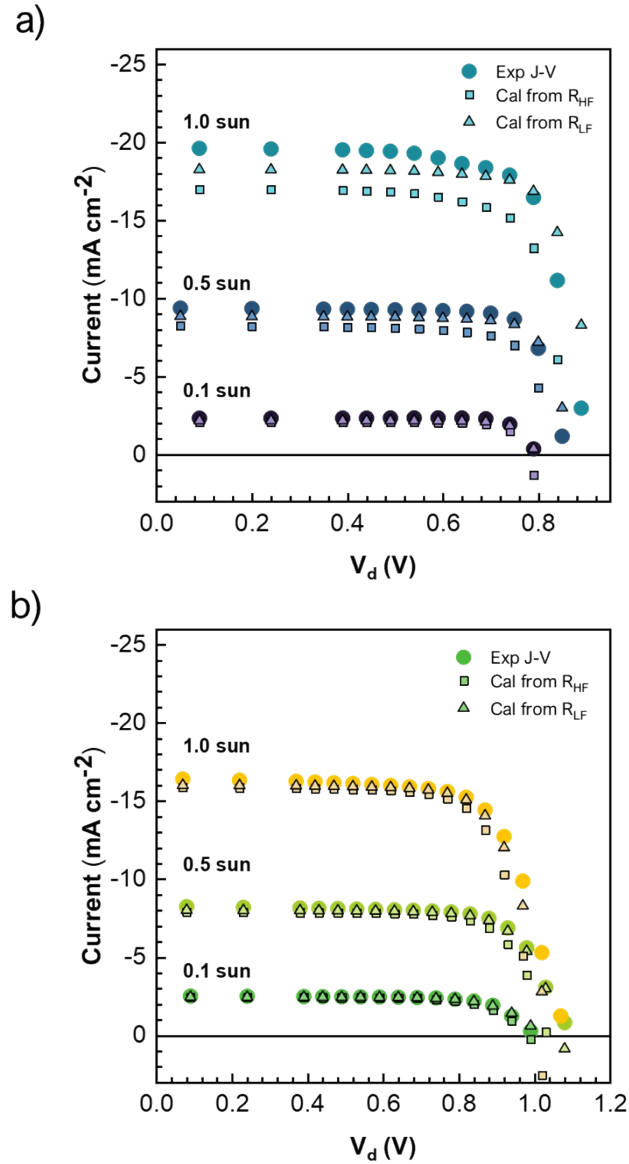

**Figure S9.** Experimental  $j$ - $V$  curve (dots) and its reconstruction (equation 4) by using  $m$  value obtained either the slope of  $R_{HF}$  vs  $V_{app}$  (squares) or  $R_{LF}$  vs  $V_{app}$  (triangles) at different illumination intensities for (a) PEDOT:PSS/C<sub>60</sub> and (b) MeO-2PACz/C<sub>60</sub> devices. The resistances are extracted using the ECM in series (Figure S8a). The voltage applied is optimized by the series resistance contribution as  $V_d = V_{app} - jR_s$ .
